1 **Title**

2 Spatially organizing biochemistry: choosing a strategy to translate synthetic biology to  
3 the factory

4

5 **Authors and Affiliations**

6 Christopher M. Jakobson<sup>1</sup>, Danielle Tullman-Ercek<sup>2</sup>, Niall M. Mangan<sup>3\*</sup>

7

8 <sup>1</sup>Department of Chemical and Systems Biology, Stanford University School of Medicine,  
9 Stanford CA 94305

10 <sup>2</sup>Department of Chemical and Biological Engineering, Northwestern University,  
11 Evanston IL 60208

12 <sup>3</sup>Department of Engineering Science and Applied Mathematics, Northwestern University,  
13 Evanston IL 60208

14 \*To whom correspondence should be addressed: [niallmm@gmail.com](mailto:niallmm@gmail.com)

15 **Abstract**

16 Natural biochemical systems are ubiquitously organized both in space and time.  
17 Engineering the spatial organization of biochemistry has emerged as a key theme of  
18 synthetic biology, with numerous technologies promising improved biosynthetic pathway  
19 performance. One strategy, however, may produce disparate results for different  
20 biosynthetic pathways. We propose a spatially resolved kinetic model to explore this  
21 fundamental design choice in systems and synthetic biology. We predict that two  
22 example biosynthetic pathways have distinct optimal organization strategies that vary  
23 based on pathway-dependent and cell-extrinsic factors. Moreover, we outline this design  
24 space in general as a function of kinetic and biophysical properties, as well as culture  
25 conditions. Our results suggest that organizing biosynthesis has the potential to  
26 substantially improve performance, but that choosing the appropriate strategy is key. The  
27 flexible mathematical framework we propose can be adapted to diverse biosynthetic  
28 pathways, and lays a foundation to rationally choose organization strategies for  
29 biosynthesis.

30

31

## 32 **Introduction**

33 Synthetic biology traces its origins to the discovery of type II restriction endonucleases  
34 (Kelly and Smith, 1970; Smith and Welcox, 1970). These enzymes allowed the  
35 controlled assembly of novel genes, plasmids, and other nucleic acids, and precipitated  
36 the rapid spread of molecular cloning technology. Since then, synthetic biology has  
37 sought to exploit, adapt, and extend biological systems to benefit society by creating  
38 pharmaceuticals, fuels, gene therapies, drug delivery platforms, probiotics, and more.  
39 Metabolic engineering, the use of microbes to produce small and large molecules of  
40 commercial and scientific interest, has been a particular focus. To this end, synthetic  
41 biologists have developed methods to control transcription and translation, knock out  
42 native genes to route metabolic flux down desired channels, integrate multiple chemical  
43 and physical inputs to make decisions inside microbial cells, and make wholesale  
44 changes to the genomes of organisms in high throughput.

45

46 A new paradigm in synthetic biology technologies focuses on a new challenge:  
47 spatiotemporal organization of biochemical processes. Organisms in all domains of life  
48 exert fine control over when and where biochemical reactions occur, be they responsible  
49 for metabolism, information transfer, or cell replication. This kind of organization  
50 remains conspicuously absent from most engineered systems.

51

52 Early efforts in synthetic biology focused on the creation of generalized systems to  
53 transcribe and translate heterologous genes and proteins in a variety of hosts, from  
54 bacteria to fungi to mammalian cells. These included the creation of modular libraries of

55 genetic parts, such as plasmids, promoters, terminators, and ribosome binding sites (Beal  
56 et al., 2014; Blazeck et al., 2012b, 2012a; Brophy and Voigt, 2016; Dahl et al., 2013;  
57 Fernandez-Rodriguez and Voigt, 2016; Leavitt et al., 2016; Lee et al., 2013, 2015;  
58 Mutalik et al., 2013; Rajkumar et al., 2016; Salis et al., 2009). It is now possible to  
59 computationally design composable genetic circuits based on these parts with high  
60 fidelity (Nielsen et al., 2016; Roehner et al., 2016). Efforts were also made to understand  
61 and control translation elongation, and inform the choice of codons in heterologous genes  
62 (Goodman et al., 2013).

63

64 Along with the introduction of foreign genes into microbial factories, it was soon  
65 recognized that removing host genes was also of critical importance. Sophisticated  
66 computational approaches now exist to predict which native genes should be removed  
67 from a microbe in order to maximize the yield of a desired biosynthetic product (Burgard  
68 et al., 2003; Price et al., 2004; Alper et al., 2005; Kim et al., 2008). These models can  
69 also include predictions of host or foreign genes whose introduction might be beneficial  
70 (Ranganathan et al., 2010; Srivastava et al., 2012).

71

72 Cellular computation, enabling cells to collect information from their environment and  
73 make decisions accordingly, has also been an important focus of synthetic biology  
74 (Purcell and Lu, 2014), but will not be discussed further here. Instead we will focus on  
75 metabolic engineering applications.

76

77 Despite all of these technological advances, there have been relatively few examples of  
78 the commercially successful, industrial scale production of chemicals by microbes  
79 (Lechner et al., 2016). Notable successes have included artemisinic acid (Paddon et al.,  
80 2013), as well as farnesene, 1,3-propanediol, and 1,4-butanediol (Lechner et al., 2016),  
81 but, by and large, the biological production of chemicals at industrially viable titers has  
82 remained elusive. This is most often due to one (or more) of five ubiquitous roadblocks to  
83 biosynthesis: cellular toxicity due to accumulation of intermediates of the biosynthetic  
84 pathway; the loss of flux to undesired byproducts; difficulties sustaining sufficient  
85 substrate influx; leakage and loss of intermediates into the culture medium; and trapping  
86 of product in the host cell due to inadequate efflux [Fig. 1A].

87

88 A new wave of synthetic biology technologies aims to address these key issues using a  
89 diverse array of strategies, while also preparing to deploy engineered microbes widely  
90 and safely. These cutting-edge approaches include cell-free approaches to protein and  
91 small molecule synthesis (Dudley et al., 2016; Garamella et al., 2016; Goering et al.,  
92 2016; Lu et al., 2015, 2014; Sullivan et al., 2016; Worst et al., 2015), dynamic control of  
93 metabolite concentrations (Xu et al., 2014) and of transcription and translation at the  
94 RNA level (Chappell et al., 2015; Takahashi and Lucks, 2013), robust approaches to  
95 biocontainment (Lopez and Anderson, 2015; Mandell et al., 2015), sensing of diverse  
96 small molecules (Mukherjee et al., 2015), establishing consortia of synergistic microbes  
97 (Marchand and Collins, 2016; Peng et al., 2016), and discovering enzymes facilitating  
98 previously unknown catalyses (Walker et al., 2013; Zhu et al., 2015). Broadly speaking,  
99 these strategies address a key missing capability in the synthetic biological toolkit: the

100 ability to control precisely when and where chemical reactions take place (Boyle and  
101 Silver, 2012; Kerfeld, 2017; Kim and Tullman-Ercek, 2013).

102

103 Here, we will analyze one class of these strategies: the spatial organization of metabolism  
104 within cells [Fig. 1B] (Polka et al., 2016). There are a wide variety of natural methods for  
105 spatial organization (Agapakis et al., 2012). Eukarya discretize their biochemistry into  
106 highly chemically distinct subcellular compartments and into enzyme complexes such as  
107 polyketide synthases (Khosla et al., 2014) and other metabolons (Wu and Minteer, 2014).  
108 Bacteria, too, are now understood to organize their metabolism in a variety of ways,  
109 including using protein-based carboxysomes (Shively et al., 1973), microcompartments  
110 (Bobik et al., 1999), and encapsulins (McHugh et al., 2014). 1,2-propanediol utilization  
111 (Pdu) microcompartments, for instance, are protein-bound organelles of approximately  
112 150 nm diameter. The enclosing protein shell consists of trimeric, pentameric, and  
113 hexameric protein tiles with central pores that permit the passage of small molecules in  
114 and out of the organelles, but which prohibit the passage of enzymes and other proteins.  
115 Building on foundational microbiological understanding of these systems (Bobik et al.,  
116 1999; Fan et al., 2010; Huseby and Roth, 2013; Kerfeld et al., 2005; Kofoed et al., 1999),  
117 we and others have demonstrated control of the formation (Kim et al., 2014), protein  
118 content (Jakobson et al., 2015; Lawrence et al., 2014; Parsons et al., 2010; Wagner et al.,  
119 2016), catalytic activity (Jakobson et al., 2016), and transport properties (Slininger Lee et  
120 al., 2017) of these organelles. Due to their relative simplicity and ease of manipulation,  
121 these various protein-based compartments make excellent model systems for exploring  
122 the role of spatial organization on metabolism.

123

124 Likewise, much work has been done to characterize carboxysomes—compartments in  
125 which CO<sub>2</sub> is concentrated to enhance carboxylation in photosynthetic bacteria-- and  
126 adapt them for engineering purposes (Cai et al., 2015, 2016; Chen et al., 2013). The  
127 modularity of carboxysomes and other CO<sub>2</sub> concentrating mechanism components  
128 facilitates reconstitution in other organisms (Bonacci et al., 2012; Gonzalez-Esquer et al.,  
129 2015). An active area of research is reconstitution in plants (Lin et al., 2014a, 2014b;  
130 Long et al., 2015), as part of a broad strategy to increase plant yields (Giessen and Silver,  
131 2017; Hanson et al., 2016; Rae et al., 2017; Sharwood et al., 2016). Engineering  
132 microbial metabolism with CO<sub>2</sub> as the primary carbon source would allow the production  
133 of sustainably produced biofuels and other high value products (Antonovsky et al., 2016;  
134 Ducat and Silver, 2012) and carboxysomes could enhance such strategies. More  
135 generally, carboxysomes have been suggested as modular method for partitioning non-  
136 native pathways from native metabolism (Kerfeld, 2017). However, we have strong  
137 indication that performance of CO<sub>2</sub> concentrating mechanisms will depend on how  
138 encapsulation interplays with transporters or other exogenous conditions setting the  
139 supply of CO<sub>2</sub> (Mangan and Brenner, 2014; Mangan et al., 2016), and further systems  
140 analysis is required to realize the benefits of carboxysome-based encapsulation (Hanson  
141 et al., 2016; Long et al., 2016).

142

143 Bacterial microcompartment organelles are not the only organization solution available to  
144 the metabolic engineer; scaffolds based on protein, lipid, DNA, and RNA have all shown  
145 promise in improving heterologous pathway performance. Each of these strategies have

146 been shown to be effective for the enhancement of heterologous biosynthesis in various  
147 contexts (Conrado et al., 2012; Delebecque et al., 2011; Dueber et al., 2009; Lawrence et  
148 al., 2014; Moon et al., 2010; Myhrvold et al., 2016). These studies organized diverse  
149 biosyntheses, including of mevalonate, resveratrol, 1,2-propanediol, and molecular  
150 hydrogen, suggesting that many different enzymatic pathways could be enhanced by  
151 scaffolding.

152

153 Having developed tools to control the localization of heterologous biosynthetic pathways  
154 to these organizing structures, a crucial question remains: what pathways are suitable for  
155 organization? And what benefits might be accrued by organizing pathways in one way  
156 versus another?

157

## 158 **Results**

159 *Pathway encapsulation in bacterial microcompartments can provide benefits comparable*  
160 *to protein engineering*

161 We will outline the potential metabolic engineering benefits that could be derived from  
162 pathway organization using two different strategies: encapsulation in the Pdu  
163 microcompartment of *Salmonella* and other enteric bacteria, and organization using a  
164 scaffold (which could be organized by means of protein, lipid, or nucleic acid) [Fig. 1C].

165

166 To address the kinetic consequences of encapsulation in these structures, we make use of  
167 a computational framework (Jakobson et al., 2017) developed to analyze the native  
168 function of the microcompartment organelles. A key prediction of this model is that

169 microcompartments significantly enhance pathway flux. We predict that the natively  
170 encapsulated system enjoys a four-order of magnitude enhancement in flux upon  
171 encapsulation, as compared to free diffusion of the enzymes in the cytosol (Jakobson et  
172 al., 2017). Appropriately chosen heterologous pathways might also accrue such flux  
173 enhancements, as well as potentially reducing the loss of pathway intermediates to the  
174 extracellular space.

175

176 To instead model a scaffolded system, we simply assume that the enzymes in question  
177 are localized to a volume equivalent to that occupied by the Pdu microcompartments, but  
178 without a diffusion barrier. This is represented mathematically by setting the velocity of  
179 transport between the scaffold volume and the cytosol equal to that predicted by free  
180 diffusion. The model formulation we use here is agnostic to the underlying scaffolding  
181 platform (protein, lipid, or nucleic acid) or its microscopic organization, as we assume a  
182 well-mixed scaffold volume.

183

184 We predict the consequences of organization using these two strategies for two model  
185 biochemical processes: native Pdu microcompartment metabolism and the heterologous  
186 mevalonate biosynthetic pathway. The compounds and enzyme kinetic parameters for  
187 each pathway are in Figure 2AB. We adapt the modeling approach used for the native  
188 Pdu system to make flux predictions for the heterologous mevalonate pathway by  
189 adjusting the enzymatic kinetic parameters, cell membrane permeability to metabolites,  
190 and enzyme abundance and stoichiometry. While the first substrate of the mevalonate  
191 pathway (acetoacetyl-CoA) is produced intracellularly, rather than entering from the

192 extracellular space (in the case of 1,2-PD), we approximate the generation of acetoacetyl-  
193 CoA upstream as a constant extracellular concentration in the context of our kinetic  
194 model. This approximation could correspond to production of acetoacetyl-CoA by a  
195 relatively faster and reversible upstream enzyme, or to more complex homeostatic control  
196 of the acetoacetyl-CoA concentration in the cytosol, both resulting in an effectively  
197 constant concentration of acetoacetyl-CoA far from the organelle or scaffold. Supporting  
198 this assumption, we find that the concentration gradient in the cytosol is small across a  
199 wide range of external substrate concentrations for all the organizational cases we tested  
200 (Fig. S1).

201

202 We first ask: is organization worth the time and trouble for the metabolic engineer to  
203 arrange, as compared to traditional metabolic and enzyme engineering strategies (such as  
204 improvements to the  $k_{cat}$  or  $K_M$  kinetic parameters)? Here, we use the native Pdu  
205 microcompartment pathway as an example. If, for instance, engineering efforts increased  
206 the  $k_{cat}$  of each of the two key enzymatic steps 100-fold, or decrease the  $K_M$  of each key  
207 step 100-fold, the improvement in flux would be as shown in Figure 2CD (as compared  
208 to the native system with no organization). Improvements of this magnitude for both  
209 enzymes represent a significant technical challenge and would be non-trivial to achieve  
210 for an arbitrary enzymatic system. We predict that encapsulation of native Pdu  
211 metabolism in an organelle is practically as effective as large improvements in  $k_{cat}$ , and  
212 more effective than large improvements in  $K_M$ , with respect to increasing the total flux  
213 through the pathway [Fig. 2C]. See the Methods for a detailed description of this  
214 calculation and the model in general. The predicted concentrations of each metabolite for

215 each kinetic case are shown in Figure S2. The dramatic improvement in predicted flux  
216 upon encapsulation is due to a large increase in the intermediate concentration in the  
217 vicinity of the second pathway enzyme, exceeding the saturating concentration.  
218 Moreover, this benefit comes without a significant increase in the cytosolic concentration  
219 of this intermediate [Fig. S2]. Our simulations predict the native Pdu microcompartment  
220 metabolic pathway benefits substantially more from encapsulation than it would from  
221 scaffolding [Fig. 2C].

222

223 On the other hand, the pathway to produce mevalonate accrues similar flux enhancement  
224 from an organelle- or scaffold-based organization strategy [Fig. 2D; Fig. S3]. Our  
225 prediction agrees with the experimental observation that organizing the mevalonate  
226 pathway on a protein scaffold increased titers (Dueber et al., 2009). We predict marginal  
227 additional benefit from an encapsulation approach in this case, since the Michaelis-  
228 Menten constants  $K_M$  for the enzymes are small, whereas we predict the potential for flux  
229 enhancement by encapsulation in an organelle is high for pathways kinetically similar to  
230 native Pdu metabolism (that is, with larger  $K_M$ ) [Fig. 2CD; see also Fig. 4B]. These kinds  
231 of predictions can be made *a priori* for any enzymatic pathway for which the kinetic  
232 parameters are known (or can be approximated).

233

234 In both cases, the increased pathway flux in the case of increasing the  $k_{cat}$  of each  
235 enzymatic step comes at the cost of greatly increased loss of intermediate species to the  
236 extracellular space (or to other cellular process, in the case that there are competing  
237 reactions in the cytosol) [Figure S4]. This tradeoff may be important to consider in some

238 cases, for instance if the intermediate species is toxic, and may render the protein  
239 engineering strategy less appealing than organization, despite similar predicted flux  
240 enhancement.

241

242 *Optimal organization strategies for biosynthetic pathways differ based on pathway*  
243 *properties and culture conditions*

244 In addition to intrinsic properties of the pathway in question, the benefits of encapsulation  
245 versus scaffolding can depend on extrinsic factors, such as the bulk concentration of  
246 substrate. At lower external substrate concentrations, flux for pathways organized with  
247 scaffolds improves relative to an organelle for both pathways we considered [Fig. 3A].  
248 This is because the rate of entry of substrate into the organelle becomes problematic at  
249 low bulk substrate concentrations, when the driving force for transport into the organelle  
250 is reduced. The rate of leakage of intermediate to the extracellular space is also affected;  
251 in each case, a scaffold leads to the greatest intermediate leakage, and this disadvantage  
252 worsens at low bulk substrate concentration for both pathways [Fig. 3B]. This  
253 underscores the importance of considering the pathway in question and the desired  
254 outcome (flux enhancement or leakage prevention) when selecting organization  
255 strategies. Modeling approaches could be extended in future to account for this duality by  
256 creating composite objective functions for the energetic cost of flux enhancement and  
257 leakage, or for the cost of the enzymes and organizing structures themselves (Noor et al.,  
258 2016), and optimizing across these different factors simultaneously.

259

260 We next consider the effects of one cell-intrinsic property (the abundance and kinetics of  
261 the second pathway enzyme) and one cell-extrinsic property (external substrate  
262 concentration) simultaneously [Fig. 3C]. These phase spaces show the optimal  
263 organizational strategy to maximize flux as a function of both variables, with the optimal  
264 strategy indicated by the color of the phase space at that parameter value combination.  
265 For reference, the dashed line in each panel of Figure 3C indicates the  $k_{cat}E_0$  value used to  
266 construct the one-dimensional representations with respect to  $S_{ext}$  in Figure 3A. While the  
267 topology of these landscapes is similar for both systems (and indeed for any irreversible  
268 two-enzyme pair governed by Michaelis-Menten kinetics), there are important  
269 quantitative differences. Critically, given the  $k_{cat}E_0$  value of the second enzyme in the  
270 mevalonate synthesis pathway, we predict that organelle-type organization is favored at  
271 high  $S_{ext}$  but scaffolding is favored at low  $S_{ext}$  values [Fig. 3C]. A batch-type reactor,  
272 therefore, might transition from organelles to scaffolds being optimal during a production  
273 run; laboratory-scale pilot experiments are most often conducted in this mode, potentially  
274 convoluting different optimality regimes. This observation holds for  $k_{cat}E_0$  values several  
275 orders of magnitude smaller or larger than our estimate. The same is not true for the  
276 native Pdu MCP system, in which organelles are favored for all  $S_{ext}$  values given our  
277 assumptions regarding  $k_{cat}E_0$  of PduP/Q [Fig. 3C]. This kind of information is key in  
278 designing optimally productive biosynthetic processes, and might call for a dynamic  
279 organizational transition as culture conditions change (Yang et al., 2017).

280

281 Finally, we demonstrate how the optimal organizational strategy changes as a function of  
282 two intrinsic pathway properties (rather than one intrinsic and one extrinsic property, as

283 in Fig. 3C). While there are many parameters that can change between pathways, we  
284 focus on two key differences between the Pdu MCP system and mevalonate pathway.  
285 The values we estimate for the cell membrane permeability to the intermediate and  $k_{cat}E_0$   
286 for the second enzyme differ by approximately two orders of magnitude between the two  
287 systems. We therefore predicted the optimal organizational strategy as a function of these  
288 two parameters, and indicated the location of each enzyme system in this phase space  
289 [Fig. 3D]. We set all model parameters besides cell membrane permeability and  $k_{cat}E_0$  to  
290 the baseline values for the Pdu MCP system. The phase space does not qualitatively  
291 change if we instead set all the other parameters to those representative of the mevalonate  
292 biosynthetic pathway [Fig. S5]. We constructed the phase space for two external substrate  
293 concentrations  $S_{ext}$ , 50 mM and 0.5 mM. Crucially, the change in external concentration  
294 shifts the boundary between the regions in which scaffold and organelle strategies are  
295 optimal. At the lower  $S_{ext}$ , mevalonate biosynthesis favors a scaffold over an organelle,  
296 while organelle organization is still favored for the Pdu MCP.

297

298 Phase spaces of the kind we explore here can be constructed for any pair of parameters,  
299 and provide a means to survey the organizational performance landscape  
300 comprehensively across a very wide range of possible parameter values. The parameters  
301 to explore could include those susceptible to manipulation via culture conditions, such as  
302  $S_{ext}$ ; those that can in principle be engineered, such as  $k_{cat}E_0$ ; and those that are intrinsic to  
303 the relevant biomolecules, such as the cell membrane permeability to the intermediate  
304 species. By constructing these phase spaces for a variety of parameters, the metabolic  
305 engineer can gain a quantitative understanding of which parameters are critical in

306 determining the optimal organization strategy for a given pathway, and can weigh the  
307 ease of altering a given parameter against the potential rewards in terms of engineering  
308 goals like pathway flux.

309

310 *Enzyme stoichiometry and kinetics, as well as design goals, influence optimal*  
311 *organization strategy*

312 We can address the question of organization choice more generally by examining the  
313 relative performance of three strategies (free cytosolic localization of enzymes; scaffolds;  
314 and microcompartments) across a wide range of enzyme kinetic parameters. Considering,  
315 for instance, the two-enzyme pathway of native Pdu metabolism, we can predict the  
316 optimal strategy as we vary the activity ( $k_{cat}E_0$ ) of each enzyme [Fig. 4A]. This variation  
317 can represent either the Pdu enzymes or a different enzymatic pathway. In this example,  
318 microcompartment organization is favored with respect to maximizing pathway flux  
319 unless the respective  $k_{cat}E_0$  parameters for both enzymes are sufficiently large to render  
320 the effect of concentrating intermediate species in the microcompartment insignificant, in  
321 which case a scaffold is recommended. Conversely, for small  $k_{cat}E_0$  of both enzymes, a  
322 strategy without spatial organization is indicated to minimize intermediate loss [Fig. 4A].  
323 These phase space predictions of organization performance can be made for arbitrary  
324 organizational strategies and metabolic pathways, given appropriate kinetic models.

325

326 *The chemical character of the substrate and intermediate also have an impact on*  
327 *organization choice*

328 In addition to the kinetic properties of the pathway enzymes, we can consider the effect  
329 of different substrates and intermediates on the choice of appropriate organizational  
330 strategies. Once again we compute the recommended organization strategy for the native  
331 Pdu metabolic pathway, and vary the values of the relevant model parameters. In this  
332 case, several parameters could be affected by the chemical character of the species,  
333 including transport across the cell membrane and transport in and out of the  
334 microcompartment organelle. If, for instance, transport of the substrate and intermediate  
335 across the microcompartment shell is slow, scaffold expression may be favored if the  $K_M$   
336 of the second enzyme is sufficiently low [Fig. 4B]. On the other hand, if escape of the  
337 intermediate across the cell membrane is slow, scaffolding may be favored regardless of  
338 enzyme kinetics [Fig. 4C], since the cell itself can perform the organelle's intermediate-  
339 concentrating function in this case. It may be possible to optimize the permeability of the  
340 microcompartment shell to the kinetics of the desired pathway and broaden the range of  
341 conditions under which an organelle is the optimal pathway (Park et al., 2017; Slininger  
342 Lee et al., 2017). All of these factors must be considered when choosing an appropriate  
343 organization strategy. This is particularly important when comparing biosynthetic  
344 pathways with substrates and intermediates of different sizes, which might reasonably be  
345 expected to have disparate transport properties at the cell membrane and  
346 microcompartment shell.

347

348 *Enzyme mechanism can alter the potential benefits of organization strategies*

349 In the above examples, we consider irreversible, Menten-Michaelis kinetics for each  
350 enzymatic step of each pathway. This assumption holds for the Pdu microcompartment

351 case, but not for all systems. For example, in the carboxysome, a carbon-fixation  
352 organelle of cyanobacteria, a key enzymatic step catalyzing the interconversion of  
353  $\text{CO}_2/\text{HCO}_3^-$  is reversible, limiting the benefit of organelles to concentrate intermediate  
354 species (Mangan and Brenner, 2014). Selective permeability of the carboxysome does not  
355 result in increased  $\text{CO}_2$  concentration (Mangan et al., 2016). The reversibility of the  
356  $\text{CO}_2/\text{HCO}_3^-$  conversion imposes a fundamental limit on the concentration of  $\text{CO}_2$  that can  
357 be achieved in the organelle [Fig. S6A]; in the microcompartment, on the other hand,  
358 selective permeability combined with enzyme irreversibility allows the development of a  
359 very high local intermediate concentration if the intermediate is selectively trapped [Fig.  
360 S6B; purple line]. The comparison between the reversible and irreversible kinetic models  
361 highlights the need to account for detailed aspects of kinetic mechanism, such as  
362 cofactors, inhibition, and other dynamic effects. Recent studies have also indicated that  
363 the local chemical environment of nucleic acid-based scaffolds can have beneficial  
364 effects on enzyme kinetics (Zhang et al., 2016); detailed kinetic effects of this kind can  
365 be incorporated into future models as they are elucidated.

366

## 367 **Discussion**

### 368 *A fundamental framework for organizational choice*

369 Above, we outline the potential for the spatial organization of heterologous pathways to  
370 greatly enhance their performance. This approach compares well with traditional enzyme  
371 engineering approaches. Furthermore, we describe a general framework to guide the  
372 choice of appropriate organizational strategies for metabolic engineering. Several key  
373 parameters must be accounted for: (I) enzyme kinetics; (II) substrate and intermediate

374 chemical properties; and (III) external culture conditions. Some of these properties, such  
375 as the external substrate concentration and the transport properties of the cell membrane,  
376 can influence the supply of substrate to the pathway, while others, such as the presence or  
377 absence of competing reactions and the transport properties of the organelle boundary,  
378 can influence the loss of metabolic flux to off-target species. We outline the use of a  
379 general modeling approach to analyze the performance of different organization  
380 strategies, and present example organizational recommendations. Moreover, modeling  
381 approaches can suggest key experiments (*e.g.* variations of external substrate  
382 concentration) that may reveal important discrepancies in the performance of different  
383 organization strategies. The MATLAB code used to generate the graphics in this  
384 manuscript is freely available on GitHub (URL TBD), and we encourage members of the  
385 metabolic engineering and synthetic biology communities to explore the organizational  
386 performance landscapes for their own systems of interest. We also welcome suggestions  
387 of other useful kinetic or organizational regimes to include in future versions of the  
388 model.

389

### 390 *Avenues to improve understanding and prediction of optimal spatial organization*

391 The framework above can provide important insights into the choice of optimal  
392 organizational strategies for heterologous pathways, but several important aspects of  
393 pathway organization remain unexplored. These include product export, cell size and  
394 morphology, competitive reactions, and the detailed organization of the organelles or  
395 scaffolds within the host cell. The organization of organelles within cells has been

396 investigated in the context of a constant cytosolic metabolite concentration (Hinzpeter et  
397 al., 2017), and future efforts could combine this and our approaches.

398

399 Our model as currently implemented can incorporate extensions to explore some of these  
400 areas, but some questions, notably the effect of competitive cellular reactions and  
401 reactions upstream of the organized process, will require the integration of our model  
402 with larger-scale metabolic models of host processes. Exploring the effect of the detailed  
403 subcellular localization of the organizing structures themselves will likewise require  
404 modifications to our current mathematical framework.

405

#### 406 *Practical engineering considerations*

407 Within the framework described here, we evaluate only the pathway flux and  
408 intermediate leakage predicted for each potential organization strategy, neglecting the  
409 difficulty associated with engineering a particular strategy. It may transpire that, for  
410 certain pathways, scaffolding proves challenging to implement due to incompatibilities  
411 between the requisite protein tags and the enzymes in question, or that the pores of  
412 microcompartment shells are fundamentally of low permeability to the substrates of other  
413 pathways. Practical experience with these issues will continue to inform the choice of  
414 appropriate strategies, and may eventually allow the integration of such practical as well  
415 as theoretical considerations into objective functions. We expect that some key  
416 experiments, such as assays to quantitatively determine the permeability of protein shells  
417 to small molecules, will greatly enhance the predictability of engineering pathways in  
418 microcompartments.

419

420 *Closing thoughts*

421 Organizing biochemistry in both time and space holds tremendous potential to help  
422 deliver on the promise of synthetic biology: the ability to produce medically and  
423 industrially important molecules at high yield and high titer with minimal environmental  
424 disruption. Spatial organization of the kind we advocate is but one of many important  
425 approaches; techniques to use multiple (or no) cells, to detect and transport metabolites,  
426 and to exert dynamic control on short time scales are of critical importance, as well. We  
427 posit that detailed mechanistic models of each of these approaches will be key in building  
428 a fundamental theoretical understanding of the optimal strategies to improve the  
429 performance of arbitrary biosyntheses.

## 430 **Materials and Methods**

431 *Contact for resource and reagent sharing*

432 For questions and further information regarding software and models used herein, please  
433 contact NMM (niallmm@gmail.com).

434

435 *Method details*

436 Model

437 The reaction-diffusion model framework used herein is substantially the same as that  
438 described in Jakobson, *et al.*, PLoS Computational Biology, 2017, in which we explored  
439 the native function of the Pdu MCP system in *S. enterica*. The analytical and numerical  
440 approach is described in detail in that manuscript, but the important assumptions can be  
441 summarized as follows:

442

- 443 1. We assume a spherically symmetrical organelle or scaffold at the center of a  
444 spherically symmetrical cell.
- 445 2. We consider the system at steady-state.
- 446 3. We assume that the external concentrations of the substrate ( $S_{ext}$ ) and intermediate are  
447 constant.
- 448 4. We assume that the activity of the enzymes can be described by irreversible Michaelis-  
449 Menten kinetics.

450

451 The governing equations are as follows in the cytosol and in the organelle or scaffold-like  
452 structure:

453 Cytosol:

454 
$$D\nabla^2 S_1(r) = 0$$

$$D\nabla^2 S_2(r) = 0$$

455 Organelle/scaffold:

456 
$$D\nabla^2 S_1(r) - R_1 = 0$$

$$D\nabla^2 S_2(r) + R_1 - R_2 = 0$$

457 where

$$R_1 = \frac{V_1 S_1(r)}{K_1 + S_1(r)}$$

458 and

$$R_2 = \frac{V_2 S_2(r)}{K_2 + S_2(r)}$$

459

460 In the case of organelle- or scaffold-based organization, a closed-form analytical solution  
461 to the governing equations can be found, provided we assume that the metabolite  
462 concentration inside the organelle or scaffold region is constant. This solution is used to  
463 generate the various figures comparing organization strategies; see Jakobson et al., 2017  
464 for the derivation and complete analytical solutions. A scaffold-like behavior is created  
465 by setting the permeability at the organelle boundary to approximate free diffusion (that  
466 is,  $k_c^{S1} = k_c^{S2} \sim 10^3$ ). In the case with no organization, we instead use a numerical  
467 solution, as the analytical solution does not hold in this regime. The numerical solution at  
468 steady state is generated by a finite difference routine implemented in MATLAB; again  
469 see Jakobson et al., 2017 for more details on the governing equations and boundary  
470 conditions used in the numerical routine.

471 Model parameters

472 The following table summarizes the important model parameters for the Pdu MCP

473 system:

| Parameter           | Meaning                                              | Estimated Value                              | Units                  |
|---------------------|------------------------------------------------------|----------------------------------------------|------------------------|
| $k_c^{S1}$          | Permeability of the Pdu MCP to propionaldehyde       | $10^{-5}$                                    | cm/s                   |
| $k_c^{S2}$          | Permeability of the Pdu MCP to 1,2-PD                | $10^{-5}$                                    | cm/s                   |
| $R_b$               | Radius of the bacterial cell                         | $5 \times 10^{-5}$                           | cm                     |
| $R_c$               | Radius of the Pdu MCP                                | $10^{-5}$ (Havemann and Bobik, 2003)         | cm                     |
| $D$                 | Diffusivity of metabolites in the cellular milieu    | $10^{-5}$ (Mastro et al., 1984)              | $\text{cm}^2/\text{s}$ |
| $k_m^{S1}$          | Permeability of the cell membrane to propionaldehyde | $10^{-2}$ (Robertson, 1983)                  | cm/s                   |
| $k_m^{S2}$          | Permeability of the cell membrane to 1,2-PD          | $10^{-2}$ (Robertson, 1983)                  | cm/s                   |
| $k_{\text{catCDE}}$ | Maximum reaction rate of a PduCDE active site        | $3 \times 10^2$ (Bachovchin et al., 1977)    | 1/s                    |
| $N_{\text{CDE}}$    | Number of PduCDE enzymes per cell                    | $1.5 \times 10^3$ (Havemann and Bobik, 2003) | Per cell               |
| $K_{\text{MCDE}}$   | Michaelis-Menten constant of PduCDE                  | $5 \times 10^2$ (Bachovchin et al., 1977)    | $\mu\text{M}$          |
| $k_{\text{catPQ}}$  | Maximum reaction rate of a PduP/Q active site        | 55 (Cheng and Bobik, 2012)                   | 1/s                    |
| $K_{\text{MPQ}}$    | Michaelis-Menten constant of PduP/Q                  | $1.5 \times 10^4$ (Cheng and Bobik, 2012)    | $\mu\text{M}$          |
| $N_{\text{PQ}}$     | Number of PduP/Q enzymes per cell                    | $2.5 \times 10^3$ (Havemann and Bobik, 2003) | Per cell               |
| $S_{\text{ext}}$    | External 1,2-PD concentration                        | $5.5 \times 10^4$ (Sampson and Bobik, 2008)  | $\mu\text{M}$          |
| $A_{\text{out}}$    | External propionaldehyde concentration               | 0 (Sampson and Bobik, 2008)                  | $\mu\text{M}$          |

474

475

476 In the case of mevalonate synthesis, the parameters are altered as follows:

| <b>Parameter</b> | <b>Meaning</b>                                       | <b>Estimated Value</b>                | <b>Units</b>  |
|------------------|------------------------------------------------------|---------------------------------------|---------------|
| $k_m^{S1}$       | Permeability of the cell membrane to acetoacetyl-CoA | $10^{-4}$                             | cm/s          |
| $k_m^{S2}$       | Permeability of the cell membrane to HMG-CoA         | $10^{-4}$                             | cm/s          |
| $k_{catCDE}$     | Maximum reaction rate of a HMGS active site          | 1.83 (Middleton, 1972)                | 1/s           |
| $N_{CDE}$        | Number of HMGS enzymes per cell                      | $5 \times 10^5$ (Dueber et al., 2009) | Per cell      |
| $K_{MCDE}$       | Michaelis-Menten constant of HMGS                    | 5 (Cabañó et al., 1997)               | $\mu\text{M}$ |
| $k_{catPQ}$      | Maximum reaction rate of a HMGR active site          | 0.023 (Pak et al., 2008)              | 1/s           |
| $K_{MPQ}$        | Michaelis-Menten constant of HMGR                    | $1 \times 10^2$ (Pak et al., 2008)    | $\mu\text{M}$ |
| $N_{PQ}$         | Number of HMGR enzymes per cell                      | $5 \times 10^5$ (Dueber et al., 2009) | Per cell      |

477

## 478 Converting literature observations to flux predictions

479 For the systems we examine here, previous literature has described either cellular growth  
480 on 1,2-PD as the sole carbon source (Sampson and Bobik, 2008) or the volumetric titer of  
481 mevalonate in a scaffolded system (Dueber et al., 2009). To compare with our model,  
482 which generates predictions on a molecules-per-cell basis, we must convert these  
483 experimental observations to a comparable measurement.

484

485 For the native Pdu microcompartments, Sampson and Bobik observe a doubling time of  
486 approximately 5-10 hours during exponential phase growth on 1,2-PD as the sole carbon  
487 source (see Figure 3 of (Sampson and Bobik, 2008)). Assuming that a bacterial cell has a  
488 mass of approximately 0.3 pg and that half of the flux through the microcompartment  
489 pathway (by mass) can be used for cell growth, the Sampson growth observation predicts  
490 a steady-state flux of approximately  $3 \times 10^{-13}$   $\mu\text{mol}/\text{cell}\cdot\text{s}$ .

491

492 In the case of mevalonate biosynthesis by a scaffolded system, Dueber and colleagues  
493 report a titer of approximately 10 mM mevalonate after 2 days of culture, after which  
494 time the concentration changes little (see Figure 5 of (Dueber et al., 2009)). Assuming  
495 constant production over this time and a cell density of  $2 \text{ OD} \sim 2 \times 10^9$  cells/mL, this titer  
496 corresponds to a steady-state flux of approximately  $3 \times 10^{-14}$   $\mu\text{mol}/\text{cell}\cdot\text{s}$ .

497

## 498 *Quantification and statistical analysis*

499 MATLAB R2016b (MathWorks) was used for all computation and to generate graphical  
500 representations of the results.

501

502 *Data and software availability*

503 The model used herein is freely available on GitHub (URL TBD) under a GNU General  
504 Public License.

505

506 **Acknowledgments**

507 This work was supported by the National Institutes of Health (grant number  
508 1F32GM125162-01 to CMJ) and the National Science Foundation (award MCB1150567  
509 to DTE). We thank the Tullman-Ercek and Jarosz laboratories for stimulating  
510 discussions.

511 The authors declare that they have no conflict of interest.

512

513 **Author contributions**

514 CMJ, DTE, and NMM conceived of the project, analyzed results, and reviewed and  
515 edited the manuscript.

516 CMJ and NMM implemented the mathematical model and wrote the original draft of the  
517 manuscript.

518 DTE and NMM supervised the project.

519 **References**

- 520 Agapakis, C.M., Boyle, P.M., and Silver, P.A. (2012). Natural strategies for the spatial  
521 optimization of metabolism in synthetic biology. *Nat. Chem. Biol.* *8*, 527–535.
- 522 Alper, H., Jin, Y.-S., Moxley, J.F., and Stephanopoulos, G. (2005). Identifying gene  
523 targets for the metabolic engineering of lycopene biosynthesis in *Escherichia coli*.  
524 *Metab. Eng.* *7*, 155–164.
- 525 Antonovsky, N., Gleizer, S., Noor, E., Zohar, Y., Herz, E., Barenholz, U., Zelcbuch, L.,  
526 Amram, S., Wides, A., Tepper, N., et al. (2016). Sugar Synthesis from CO<sub>2</sub> in  
527 *Escherichia coli*. *Cell* *166*, 115–125.
- 528 Bachovchin, W.W., Eagar, R.G., Moore, K.W., and Richards, J.H. (1977). Mechanism of  
529 action of adenosylcobalamin: glycerol and other substrate analogs as substrates and  
530 inactivators for propanediol dehydratase - kinetics, stereospecificity, and  
531 mechanism. *Biochemistry (Mosc.)* *16*, 1082–1092.
- 532 Beal, J., Wagner, T.E., Kitada, T., Azizgolshani, O., Parker, J.M., Densmore, D., and  
533 Weiss, R. (2014). Model-Driven Engineering of Gene Expression from RNA  
534 Replicons. *ACS Synth. Biol.* *4*, 48–56.
- 535 Blazeck, J., Garg, R., Reed, B., and Alper, H.S. (2012b). Controlling promoter strength  
536 and regulation in *Saccharomyces cerevisiae* using synthetic hybrid promoters.  
537 *Biotechnol. Bioeng.* *109*, 2884–2895.
- 538 Blazeck, J., Reed, B., Garg, R., Gerstner, R., Pan, A., Agarwala, V., and Alper, H.S.  
539 (2012a). Generalizing a hybrid synthetic promoter approach in *Yarrowia lipolytica*.  
540 *Appl. Microbiol. Biotechnol.* *97*, 3037–3052.
- 541 Bobik, T.A., Havemann, G.D., Busch, R.J., Williams, D.S., and Aldrich, H.C. (1999). The  
542 Propanediol Utilization (pdu) Operon of *Salmonella enterica* Serovar Typhimurium  
543 LT2 Includes Genes Necessary for Formation of Polyhedral Organelles Involved in  
544 Coenzyme B<sub>12</sub>-Dependent 1, 2-Propanediol Degradation. *J. Bacteriol.* *181*, 5967–  
545 5975.
- 546 Bonacci, W., Teng, P.K., Afonso, B., Niederholtmeyer, H., Grob, P., Silver, P.A., and  
547 Savage, D.F. (2012). Modularity of a carbon-fixing protein organelle. *Proc. Natl. Acad.*  
548 *Sci.* *109*, 478–483.
- 549 Boyle, P.M., and Silver, P.A. (2012). Parts plus pipes: Synthetic biology approaches to  
550 metabolic engineering. *Metab. Eng.* *14*, 223–232.
- 551 Brophy, J.A., and Voigt, C.A. (2016). Antisense transcription as a tool to tune gene  
552 expression. *Mol. Syst. Biol.* *12*, 854.

- 553 Burgard, A.P., Pharkya, P., and Maranas, C.D. (2003). Optknock: A bilevel  
554 programming framework for identifying gene knockout strategies for microbial  
555 strain optimization. *Biotechnol. Bioeng.* *84*, 647–657.
- 556 Cabañó, J., Buesa, C., Hegardt, F.G., and Marrero, P.F. (1997). Catalytic properties of  
557 recombinant 3-Hydroxy-3-Methylglutaryl Coenzyme A Synthase-1 from *Blattella*  
558 *Germanica*. *Insect Biochem. Mol. Biol.* *27*, 499–505.
- 559 Cai, F., Sutter, M., Bernstein, S.L., Kinney, J.N., and Kerfeld, C.A. (2015). Engineering  
560 Bacterial Microcompartment Shells: Chimeric Shell Proteins and Chimeric  
561 Carboxysome Shells. *ACS Synth. Biol.* *4*, 444–453.
- 562 Cai, F., Bernstein, S.L., Wilson, S.C., and Kerfeld, C.A. (2016). Production and  
563 Characterization of Synthetic Carboxysome Shells with Incorporated Luminal  
564 Proteins. *Plant Physiol.* pp.01822.2015.
- 565 Chappell, J., Takahashi, M.K., and Lucks, J.B. (2015). Creating small transcription  
566 activating RNAs. *Nat. Chem. Biol.* *11*, 214–220.
- 567 Chen, A.H., Robinson-Mosher, A., Savage, D.F., Silver, P.A., and Polka, J.K. (2013). The  
568 Bacterial Carbon-Fixing Organelle Is Formed by Shell Envelopment of Preassembled  
569 Cargo. *PLoS ONE* *8*, e76127.
- 570 Cheng, S., and Bobik, T.A. (2012). The PduQ Enzyme Is an Alcohol Dehydrogenase  
571 Used to Recycle NAD<sup>+</sup> Internally within the Pdu Microcompartment of *Salmonella*  
572 *enterica*.
- 573 Conrado, R.J., Wu, G.C., Boock, J.T., Xu, H., Chen, S.Y., Lebar, T., Turnsek, J., Tomsic, N.,  
574 Avbelj, M., Gaber, R., et al. (2012). DNA-guided assembly of biosynthetic pathways  
575 promotes improved catalytic efficiency. *Nucleic Acids Res.* *40*, 1879–1889.
- 576 Dahl, R.H., Zhang, F., Alonso-Gutierrez, J., Baidoo, E., Batth, T.S., Redding-Johanson,  
577 A.M., Petzold, C.J., Mukhopadhyay, A., Lee, T.S., Adams, P.D., et al. (2013).  
578 Engineering dynamic pathway regulation using stress-response promoters. *Nat.*  
579 *Biotechnol.* *31*, 1039–1046.
- 580 Delebecque, C.J., Lindner, A.B., Silver, P.A., and Aldaye, F.A. (2011). Organization of  
581 Intracellular Reactions with Rationally Designed RNA Assemblies. *Science* *333*, 470–  
582 474.
- 583 Ducat, D.C., and Silver, P.A. (2012). Improving Carbon Fixation Pathways. *Curr. Opin.*  
584 *Chem. Biol.* *16*, 337–344.
- 585 Dudley, Q.M., Anderson, K.C., and Jewett, M.C. (2016). Cell-Free Mixing of *Escherichia*  
586 *coli* Crude Extracts to Prototype and Rationally Engineer High-Titer Mevalonate  
587 Synthesis. *ACS Synth. Biol.*

- 588 Dueber, J.E., Wu, G.C., Malmirchegini, G.R., Moon, T.S., Petzold, C.J., Ullal, A.V., Prather,  
589 K.L., and Keasling, J.D. (2009). Synthetic protein scaffolds provide modular control  
590 over metabolic flux. *Nat. Biotechnol.* *27*, 753–759.
- 591 Fan, C., Cheng, S., Liu, Y., Escobar, C.M., Crowley, C.S., Jefferson, R.E., Yeates, T.O., and  
592 Bobik, T.A. (2010). Short N-terminal sequences package proteins into bacterial  
593 microcompartments. *Proc. Natl. Acad. Sci.* *107*, 7509–7514.
- 594 Fernandez-Rodriguez, J., and Voigt, C.A. (2016). Post-translational control of genetic  
595 circuits using Potyvirus proteases. *Nucleic Acids Res.* *44*, 6493–6502.
- 596 Garamella, J., Marshall, R., Rustad, M., and Noireaux, V. (2016). The All E. coli TX-TL  
597 Toolbox 2.0: A Platform for Cell-Free Synthetic Biology. *ACS Synth. Biol.* *5*, 344–355.
- 598 Giessen, T.W., and Silver, P.A. (2017). Engineering carbon fixation with artificial  
599 protein organelles. *Curr. Opin. Biotechnol.* *46*, 42–50.
- 600 Goering, A.W., Li, J., McClure, R.A., Thomson, R.J., Jewett, M.C., and Kelleher, N.L.  
601 (2016). In Vitro Reconstruction of Nonribosomal Peptide Biosynthesis Directly from  
602 DNA Using Cell-Free Protein Synthesis. *ACS Synth. Biol.*
- 603 Gonzalez-Esquer, C.R., Shubitowski, T.B., and Kerfeld, C.A. (2015). Streamlined  
604 Construction of the Cyanobacterial CO<sub>2</sub>-Fixing Organelle via Protein Domain  
605 Fusions for Use in Plant Synthetic Biology. *Plant Cell tpc.15.00329*.
- 606 Goodman, D.B., Church, G.M., and Kosuri, S. (2013). Causes and Effects of N-Terminal  
607 Codon Bias in Bacterial Genes. *Science*.
- 608 Hanson, M.R., Lin, M.T., Carmo-Silva, A.E., and Parry, M.A.J. (2016). Towards  
609 engineering carboxysomes into C3 plants. *Plant J.* *87*, 38–50.
- 610 Havemann, G.D., and Bobik, T.A. (2003). Protein content of polyhedral organelles  
611 involved in coenzyme B<sub>12</sub>-dependent degradation of 1, 2-propanediol in *Salmonella*  
612 *enterica* serovar Typhimurium LT2. *J. Bacteriol.* *185*, 5086–5095.
- 613 Hinzpeter, F., Gerland, U., and Tostevin, F. (2017). Optimal Compartmentalization  
614 Strategies for Metabolic Microcompartments. *Biophys. J.* *112*, 767–779.
- 615 Huseby, D.L., and Roth, J.R. (2013). Evidence that a Metabolic Microcompartment  
616 Contains and Recycles Private Cofactor Pools. *J. Bacteriol.* *195*, 2864–2879.
- 617 Jakobson, C.M., Kim, E.Y., Slininger, M.F., Chien, A., and Tullman-Ercek, D. (2015).  
618 Localization of Proteins to the 1,2-Propanediol Utilization Microcompartment by  
619 Non-native Signal Sequences Is Mediated by a Common Hydrophobic Motif. *J. Biol.*  
620 *Chem.* *290*, 24519–24533.

- 621 Jakobson, C.M., Chen, Y., Slininger, M.F., Valdivia, E., Kim, E.Y., and Tullman-Ercek, D.  
622 (2016). Tuning the Catalytic Activity of Subcellular Nanoreactors. *J. Mol. Biol.*
- 623 Jakobson, C.M., Tullman-Ercek, D., Slininger, M.F., and Mangan, N.M. (2017). A  
624 systems-level model reveals that 1,2-Propanediol utilization microcompartments  
625 enhance pathway flux through intermediate sequestration. *PLOS Comput. Biol.* *13*,  
626 e1005525.
- 627 Kelly, T.J., and Smith, H.O. (1970). A restriction enzyme from *Hemophilus influenzae*.  
628 *J. Mol. Biol.* *51*, 393–409.
- 629 Kerfeld, C.A. (2017). A bioarchitectonic approach to the modular engineering of  
630 metabolism. *Phil Trans R Soc B* *372*, 20160387.
- 631 Kerfeld, C.A., Sawaya, M.R., Tanaka, S., Nguyen, C.V., Phillips, M., Beeby, M., and  
632 Yeates, T.O. (2005). Protein structures forming the shell of primitive bacterial  
633 organelles. *Science* *309*, 936–938.
- 634 Khosla, C., Herschlag, D., Cane, D.E., and Walsh, C.T. (2014). Assembly Line  
635 Polyketide Synthases: Mechanistic Insights and Unsolved Problems. *Biochemistry*  
636 (*Mosc.*) *53*, 2875–2883.
- 637 Kim, E.Y., and Tullman-Ercek, D. (2013). Engineering nanoscale protein  
638 compartments for synthetic organelles. *Curr. Opin. Biotechnol.* *24*, 627–632.
- 639 Kim, E.Y., Jakobson, C.M., and Tullman-Ercek, D. (2014). Engineering Transcriptional  
640 Regulation to Control Pdu Microcompartment Formation. *PLoS ONE* *9*, e113814.
- 641 Kim, H.U., Kim, T.Y., and Lee, S.Y. (2008). Metabolic flux analysis and metabolic  
642 engineering of microorganisms. *Mol. BioSyst.* *4*, 113–120.
- 643 Kofoid, E., Rappleye, C., Stojiljkovic, I., and Roth, J. (1999). The 17-Gene  
644 Ethanolamine (eut) Operon of *Salmonella typhimurium* Encodes Five Homologues of  
645 Carboxysome Shell Proteins. *J. Bacteriol.* *181*, 5317–5329.
- 646 Lawrence, A.D., Frank, S., Newnham, S., Lee, M.J., Brown, I.R., Xue, W.-F., Rowe, M.L.,  
647 Mulvihill, D.P., Prentice, M.B., Howard, M.J., et al. (2014). Solution Structure of a  
648 Bacterial Microcompartment Targeting Peptide and Its Application in the  
649 Construction of an Ethanol Bioreactor. *ACS Synth. Biol.* 140224092559007.
- 650 Leavitt, J.M., Tong, A., Tong, J., Pattie, J., and Alper, H.S. (2016). Coordinated  
651 transcription factor and promoter engineering to establish strong expression  
652 elements in *Saccharomyces cerevisiae*. *Biotechnol. J.* *11*, 866–876.
- 653 Lechner, A., Brunk, E., and Keasling, J.D. (2016). The Need for Integrated Approaches  
654 in Metabolic Engineering. *Cold Spring Harb. Perspect. Biol.* *8*, a023903.

- 655 Lee, M.E., Aswani, A., Han, A.S., Tomlin, C.J., and Dueber, J.E. (2013). Expression-level  
656 optimization of a multi-enzyme pathway in the absence of a high-throughput assay.  
657 *Nucleic Acids Res.* *41*, 10668–10678.
- 658 Lee, M.E., DeLoache, W.C., Cervantes, B., and Dueber, J.E. (2015). A Highly  
659 Characterized Yeast Toolkit for Modular, Multipart Assembly. *ACS Synth. Biol.* *4*,  
660 975–986.
- 661 Lin, M.T., Occhialini, A., Andralojc, P.J., Parry, M.A.J., and Hanson, M.R. (2014a). A  
662 faster Rubisco with potential to increase photosynthesis in crops. *Nature* *513*, 547–  
663 550.
- 664 Lin, M.T., Occhialini, A., Andralojc, P.J., Devonshire, J., Hines, K.M., Parry, M.A.J., and  
665 Hanson, M.R. (2014b).  $\beta$ -Carboxysomal proteins assemble into highly organized  
666 structures in *Nicotiana* chloroplasts. *Plant J. Cell Mol. Biol.* *79*, 1–12.
- 667 Long, B.M., Rae, B.D., Rolland, V., Förster, B., and Price, G.D. (2016). Cyanobacterial  
668 CO<sub>2</sub>-concentrating mechanism components: function and prospects for plant  
669 metabolic engineering. *Curr. Opin. Plant Biol.* *31*, 1–8.
- 670 Long, S.P., Marshall-Colon, A., and Zhu, X.-G. (2015). Meeting the Global Food  
671 Demand of the Future by Engineering Crop Photosynthesis and Yield Potential. *Cell*  
672 *161*, 56–66.
- 673 Lopez, G., and Anderson, J.C. (2015). Synthetic Auxotrophs with Ligand-Dependent  
674 Essential Genes for a BL21(DE3) Biosafety Strain. *ACS Synth. Biol.* *4*, 1279–1286.
- 675 Lu, F., Smith, P.R., Mehta, K., and Swartz, J.R. (2015). Development of a synthetic  
676 pathway to convert glucose to hydrogen using cell free extracts. *Int. J. Hydrog.*  
677 *Energy* *40*, 9113–9124.
- 678 Lu, Y., Welsh, J.P., and Swartz, J.R. (2014). Production and stabilization of the  
679 trimeric influenza hemagglutinin stem domain for potentially broadly protective  
680 influenza vaccines. *Proc. Natl. Acad. Sci.* *111*, 125–130.
- 681 Mandell, D.J., Lajoie, M.J., Mee, M.T., Takeuchi, R., Kuznetsov, G., Norville, J.E., Gregg,  
682 C.J., Stoddard, B.L., and Church, G.M. (2015). Biocontainment of genetically modified  
683 organisms by synthetic protein design. *Nature* *518*, 55–60.
- 684 Mangan, N.M., and Brenner, M.P. (2014). Systems analysis of the CO<sub>2</sub> concentrating  
685 mechanism in cyanobacteria. *eLife* *3*, e02043.
- 686 Mangan, N.M., Flamholz, A., Hood, R.D., Milo, R., and Savage, D.F. (2016). pH  
687 determines the energetic efficiency of the cyanobacterial CO<sub>2</sub> concentrating  
688 mechanism. *Proc. Natl. Acad. Sci.* *113*, E5354–E5362.

- 689 Marchand, N., and Collins, C.H. (2016). Synthetic Quorum Sensing and Cell-Cell  
690 Communication in Gram-Positive *Bacillus megaterium*. *ACS Synth. Biol.* *5*, 597–606.
- 691 Mastro, A.M., Babich, M.A., Taylor, W.D., and Keith, A.D. (1984). Diffusion of a small  
692 molecule in the cytoplasm of mammalian cells. *Proc. Natl. Acad. Sci.* *81*, 3414–3418.
- 693 McHugh, C.A., Fontana, J., Nemecek, D., Cheng, N., Aksyuk, A.A., Heymann, J.B.,  
694 Winkler, D.C., Lam, A.S., Wall, J.S., Steven, A.C., et al. (2014). A virus capsid-like  
695 nanocompartment that stores iron and protects bacteria from oxidative stress.  
696 *EMBO J.* *33*, 1896–1911.
- 697 Middleton, B. (1972). The kinetic mechanism of 3-hydroxy-3-methylglutaryl-  
698 coenzyme A synthase from baker's yeast. *Biochem. J.* *126*, 35–47.
- 699 Moon, T.S., Dueber, J.E., Shiue, E., and Prather, K.L.J. (2010). Use of modular,  
700 synthetic scaffolds for improved production of glucaric acid in engineered *E. coli*.  
701 *Metab. Eng.* *12*, 298–305.
- 702 Mukherjee, K., Bhattacharyya, S., and Peralta-Yahya, P. (2015). GPCR-Based  
703 Chemical Biosensors for Medium-Chain Fatty Acids. *ACS Synth. Biol.* *4*, 1261–1269.
- 704 Mutalik, V.K., Guimaraes, J.C., Cambray, G., Lam, C., Christoffersen, M.J., Mai, Q.-A.,  
705 Tran, A.B., Paull, M., Keasling, J.D., Arkin, A.P., et al. (2013). Precise and reliable gene  
706 expression via standard transcription and translation initiation elements. *Nat.*  
707 *Methods* *10*, 354–360.
- 708 Myhrvold, C., Polka, J.K., and Silver, P.A. (2016). Synthetic Lipid-Containing Scaffolds  
709 Enhance Production by Colocalizing Enzymes. *ACS Synth. Biol.* *5*, 1396–1403.
- 710 Nielsen, A.A.K., Der, B.S., Shin, J., Vaidyanathan, P., Paralanov, V., Strychalski, E.A.,  
711 Ross, D., Densmore, D., and Voigt, C.A. (2016). Genetic circuit design automation.  
712 *Science* *352*, aac7341.
- 713 Noor, E., Flamholz, A., Bar-Even, A., Davidi, D., Milo, R., and Liebermeister, W. (2016).  
714 The Protein Cost of Metabolic Fluxes: Prediction from Enzymatic Rate Laws and Cost  
715 Minimization. *PLOS Comput. Biol.* *12*, e1005167.
- 716 Paddon, C.J., Westfall, P.J., Pitera, D.J., Benjamin, K., Fisher, K., McPhee, D., Leavell,  
717 M.D., Tai, A., Main, A., Eng, D., et al. (2013). High-level semi-synthetic production of  
718 the potent antimalarial artemisinin. *Nature* *496*, 528–532.
- 719 Pak, V.V., Koo, M., Kim, M.J., Yang, H.J., Yun, L., and Kwon, D.Y. (2008). Modeling an  
720 active conformation for linear peptides and design of a competitive inhibitor for  
721 HMG-CoA reductase. *J. Mol. Recognit. JMR* *21*, 224–232.

- 722 Park, J., Chun, S., Bobik, T.A., Houk, K.N., and Yeates, T.O. (2017). Molecular Dynamics  
723 Simulations of Selective Metabolite Transport across the Propanediol Bacterial  
724 Microcompartment Shell. *J. Phys. Chem. B*.
- 725 Parsons, J.B., Frank, S., Bhella, D., Liang, M., Prentice, M.B., Mulvihill, D.P., and  
726 Warren, M.J. (2010). Synthesis of Empty Bacterial Microcompartments, Directed  
727 Organelle Protein Incorporation, and Evidence of Filament-Associated Organelle  
728 Movement. *Mol. Cell* 38, 305–315.
- 729 Peng, X. “Nick,” Gilmore, S.P., and O’Malley, M.A. (2016). Microbial communities for  
730 bioprocessing: lessons learned from nature. *Curr. Opin. Chem. Eng.* 14, 103–109.
- 731 Polka, J.K., Hays, S.G., and Silver, P.A. (2016). Building Spatial Synthetic Biology with  
732 Compartments, Scaffolds, and Communities. *Cold Spring Harb. Perspect. Biol.* 8.
- 733 Price, N.D., Reed, J.L., and Palsson, B.Ø. (2004). Genome-scale models of microbial  
734 cells: evaluating the consequences of constraints. *Nat. Rev. Microbiol.* 2, 886–897.
- 735 Purcell, O., and Lu, T.K. (2014). Synthetic analog and digital circuits for cellular  
736 computation and memory. *Curr. Opin. Biotechnol.* 29, 146–155.
- 737 Rae, B.D., Long, B.M., Förster, B., Nguyen, N.D., Velanis, C.N., Atkinson, N., Hee, W.Y.,  
738 Mukherjee, B., Price, G.D., and McCormick, A.J. (2017). Progress and challenges of  
739 engineering a biophysical carbon dioxide-concentrating mechanism into higher  
740 plants. *J. Exp. Bot.*
- 741 Rajkumar, A.S., Liu, G., Bergenholm, D., Arsovska, D., Kristensen, M., Nielsen, J.,  
742 Jensen, M.K., and Keasling, J.D. (2016). Engineering of synthetic, stress-responsive  
743 yeast promoters. *Nucleic Acids Res.* gkw553.
- 744 Ranganathan, S., Suthers, P.F., and Maranas, C.D. (2010). OptForce: An Optimization  
745 Procedure for Identifying All Genetic Manipulations Leading to Targeted  
746 Overproductions. *PLOS Comput Biol* 6, e1000744.
- 747 Robertson, R.N. (1983). *Lively Membranes* (CUP Archive).
- 748 Roehner, N., Young, E.M., Voigt, C.A., Gordon, D.B., and Densmore, D. (2016). Double  
749 Dutch: A Tool for Designing Combinatorial Libraries of Biological Systems. *ACS*  
750 *Synth. Biol.* 5, 507–517.
- 751 Salis, H.M., Mirsky, E.A., and Voigt, C.A. (2009). Automated design of synthetic  
752 ribosome binding sites to control protein expression. *Nat. Biotechnol.* 27, 946–950.
- 753 Sampson, E.M., and Bobik, T.A. (2008). Microcompartments for B12-Dependent 1,2-  
754 Propanediol Degradation Provide Protection from DNA and Cellular Damage by a  
755 Reactive Metabolic Intermediate. *J. Bacteriol.* 190, 2966–2971.

- 756 Sharwood, R.E., Ghannoum, O., and Whitney, S.M. (2016). Prospects for improving  
757 CO<sub>2</sub> fixation in C<sub>3</sub>-crops through understanding C<sub>4</sub>-Rubisco biogenesis and catalytic  
758 diversity. *Curr. Opin. Plant Biol.* *31*, 135–142.
- 759 Shively, J., Ball, F., and Kline, B. (1973). Electron Microscopy of the Carboxysomes  
760 (Polyhedral Bodies) of *Thiobacillus neapolitanus*. *J. Bacteriol.* *116*, 1405–1411.
- 761 Slininger Lee, M.F., Jakobson, C.M., and Tullman-Ercek, D. (2017). Evidence for  
762 Improved Encapsulated Pathway Behavior in a Bacterial Microcompartment  
763 through Shell Protein Engineering. *ACS Synth. Biol.*
- 764 Smith, H.O., and Welcox, K.W. (1970). A Restriction enzyme from *Hemophilus*  
765 *influenzae*. *J. Mol. Biol.* *51*, 379–391.
- 766 Srivastava, S., Kotker, J., Hamilton, S., Ruan, P., Tsui, J., Anderson, J.C., Bodik, R., and  
767 Seshia, S. (2012). Pathway Synthesis using the Act Ontology. 4th Int. Workshop Bio-  
768 Des. Autom. IWBD A.
- 769 Sullivan, C.J., Pendleton, E.D., Sasmor, H.H., Hicks, W.L., Farnum, J.B., Muto, M.,  
770 Amendt, E.M., Schoborg, J.A., Martin, R.W., Clark, L.G., et al. (2016). A cell-free  
771 expression and purification process for rapid production of protein biologics.  
772 *Biotechnol. J.* *11*, 238–248.
- 773 Takahashi, M.K., and Lucks, J.B. (2013). A modular strategy for engineering  
774 orthogonal chimeric RNA transcription regulators. *Nucleic Acids Res.* *41*, 7577–  
775 7588.
- 776 Wagner, H.J., Capitain, C.C., Richter, K., Nessling, M., and Mampel, J. (2016).  
777 Engineering bacterial microcompartments with heterologous enzyme cargos. *Eng.*  
778 *Life Sci.* n/a-n/a.
- 779 Walker, M.C., Thuronyi, B.W., Charkoudian, L.K., Lowry, B., Khosla, C., and Chang,  
780 M.C.Y. (2013). Expanding the Fluorine Chemistry of Living Systems Using  
781 Engineered Polyketide Synthase Pathways. *Science* *341*, 1089–1094.
- 782 Worst, E.G., Exner, M.P., De Simone, A., Schenkelberger, M., Noireaux, V., Budisa, N.,  
783 and Ott, A. (2015). Cell-free expression with the toxic amino acid canavanine.  
784 *Bioorg. Med. Chem. Lett.* *25*, 3658–3660.
- 785 Wu, F., and Minter, S. (2014). Krebs Cycle Metabolon: Structural Evidence of  
786 Substrate Channeling Revealed by Cross-Linking and Mass Spectrometry. *Angew.*  
787 *Chem. Int. Ed.* n/a-n/a.
- 788 Xu, P., Li, L., Zhang, F., Stephanopoulos, G., and Koffas, M. (2014). Improving fatty  
789 acids production by engineering dynamic pathway regulation and metabolic control.  
790 *Proc. Natl. Acad. Sci.* *111*, 11299–11304.

- 791 Yang, L., Dolan, E.M., Tan, S.K., Lin, T., Sontag, E.D., and Khare, S. (2017).  
792 Computation-guided design of a stimulus-responsive multi-enzyme supramolecular  
793 assembly. *ChemBioChem* n/a-n/a.
- 794 Zhang, Y., Tsitkov, S., and Hess, H. (2016). Proximity does not contribute to activity  
795 enhancement in the glucose oxidase–horseradish peroxidase cascade. *Nat. Commun.*  
796 7, 13982.
- 797 Zhu, X., Liu, J., and Zhang, W. (2015). De novo biosynthesis of terminal alkyne-  
798 labeled natural products. *Nat. Chem. Biol.* 11, 115–120.
- 799

## 800 **Figure Legends**

801 **Figure 1.** (A) Roadblocks commonly facing heterologous biosynthesis. (B) Potential  
802 organization strategies to alleviate these roadblocks. (C) Schematics of our models of  
803 (left) a pathway without organization, (middle) a pathway organized on a scaffold, and  
804 (right) a pathway organized in an organelle.

805

806 **Figure 2.** Relevant substrates, intermediates, products, and enzyme kinetic parameters for  
807 (A) native Pdu microcompartment metabolism and (B) mevalonate biosynthesis.  
808 Predicted pathway flux for (C) native Pdu microcompartment metabolism and (D)  
809 mevalonate biosynthesis for native kinetics without organization; 100-fold improvement  
810 of  $k_{cat}$  for both pathway enzymes; 100-fold improvement in  $K_M$  for both pathway  
811 enzymes; native kinetics with organization on a scaffold; and native kinetics with  
812 organization in a microcompartment organelle. The predictions here are based on an  
813 external substrate concentration of 50 mM 1,2-propanediol, as is typically used in  
814 experiments (Sampson and Bobik, 2008). We use the same external substrate  
815 concentration (50 mM) in the mevalonate case. Experimental observations in (C) and (D)  
816 are calculated from *S. enterica* growth rates from Sampson and Bobik, 2008 and from  
817 titer measurements for a scaffolded system from Dueber et al., 2009.

818

819 **Figure 3.** (A) Predicted flux for (left) native Pdu microcompartment metabolism and  
820 (right) mevalonate biosynthesis without organization (grey); with organization on a  
821 scaffold (orange); and with organization in an organelle (blue) as a function of external  
822 substrate concentration  $S_{ext}$ . (B) Predicted intermediate leakage for (left) native Pdu

823 microcompartment metabolism and (right) mevalonate biosynthesis without organization  
824 (grey); with organization on a scaffold (orange); and with organization in an organelle  
825 (blue) as a function of external substrate concentration  $S_{ext}$ . (C) Predicted optimal  
826 organizational strategy for (left) native Pdu microcompartment metabolism and (right)  
827 mevalonate biosynthesis as a function of external substrate concentration  $S_{ext}$  and the  
828 abundance and kinetics of the second pathway enzyme  $k_{cat}E_0$  (PduP/Q and HMGR,  
829 respectively). Baseline parameter values are shown with a black dashed line. (D)  
830 Predicted optimal organizational strategy for native Pdu microcompartment metabolism  
831 (magenta) and mevalonate biosynthesis (purple) as a function of the abundance and  
832 kinetics of the second pathway enzyme  $k_{cat}E_0$  (PduP/Q and HMGR, respectively) and the  
833 cell membrane permeability to the intermediate at (left) external substrate concentration  
834  $S_{ext} = 50$  mM and (right)  $S_{ext} = 0.5$  mM. Regions of parameter space are colored by the  
835 optimal organization strategy in that region: organelle (blue); scaffold (orange); or no  
836 organization (grey).

837

838 **Figure 4.** Recommended organization strategy resulting in (left) maximum pathway flux  
839 or (right) minimum intermediate leakage for native Pdu metabolism as a function of (A)  
840  $k_{cat}E_0$  of PduCDE and PduP/Q, (B) organelle permeability and  $K_M$  of PduP/Q, and (C)  
841 organelle permeability and cell membrane permeability. Regions of parameter space are  
842 colored by the optimal organization strategy in that region: organelle (blue); scaffold  
843 (orange); or no organization (grey). Baseline parameter values are shown with a black  
844 dashed line.

## Figures

To accompany: Spatially organizing biochemistry: choosing a strategy to translate synthetic biology to the factory

Christopher M. Jakobson, Danielle Tullman-Ercek, Niall M. Mangan



**Figure 1.**



**Figure 2.**



**Figure 3.**
